# Supplementary material
Source: PubMed Central journal article supplement (PMC2758030)

# SUP. FIGURE 1

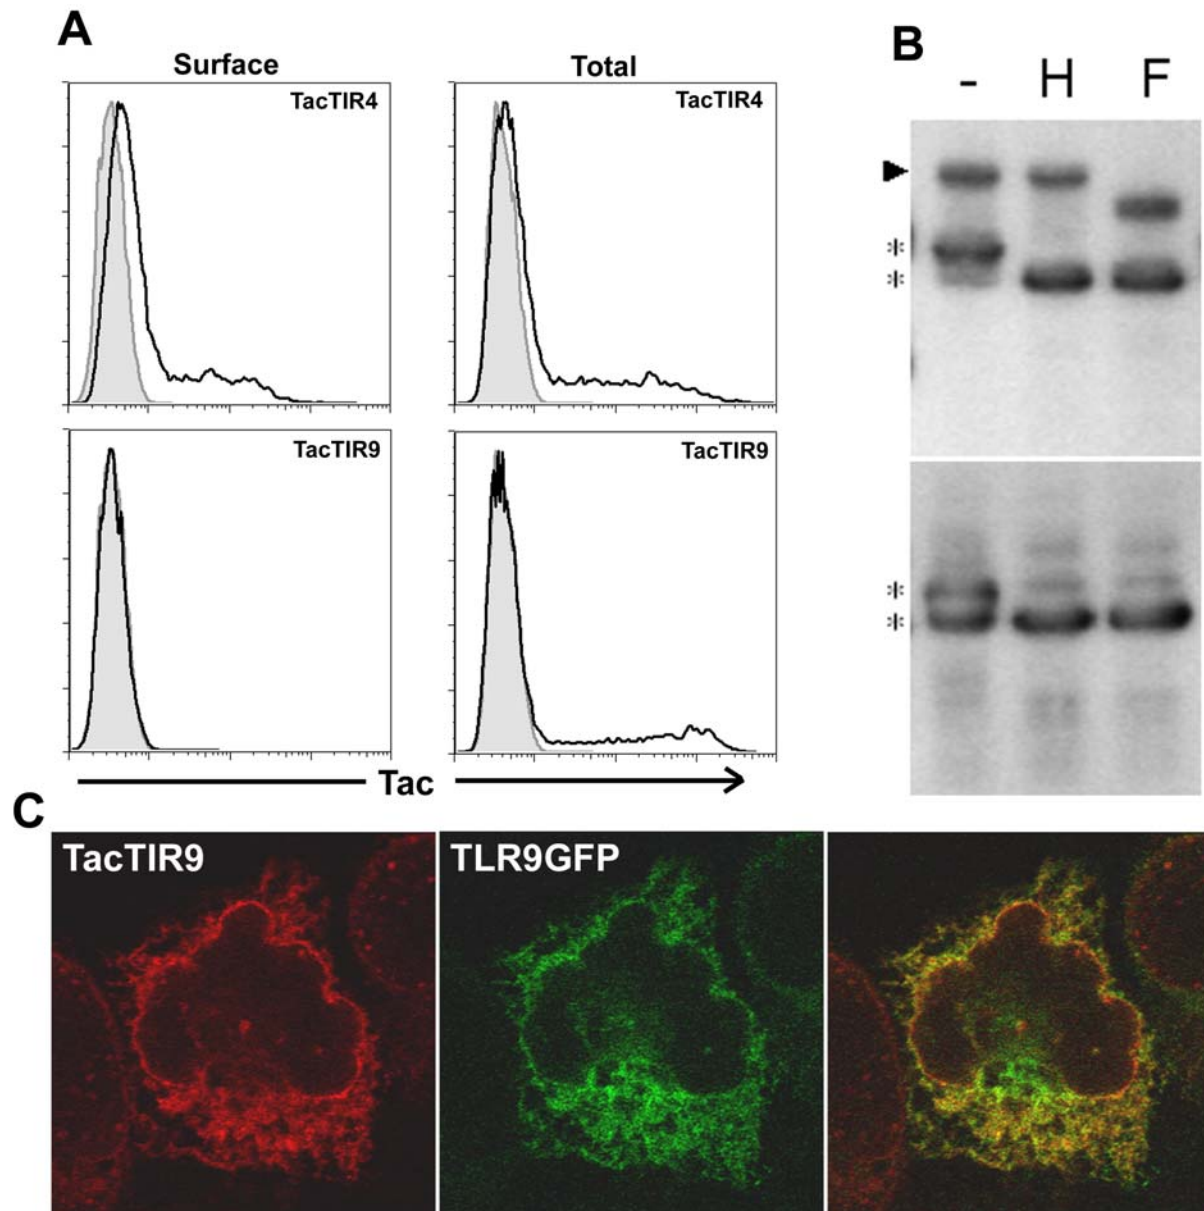

## SUP. FIGURE 2

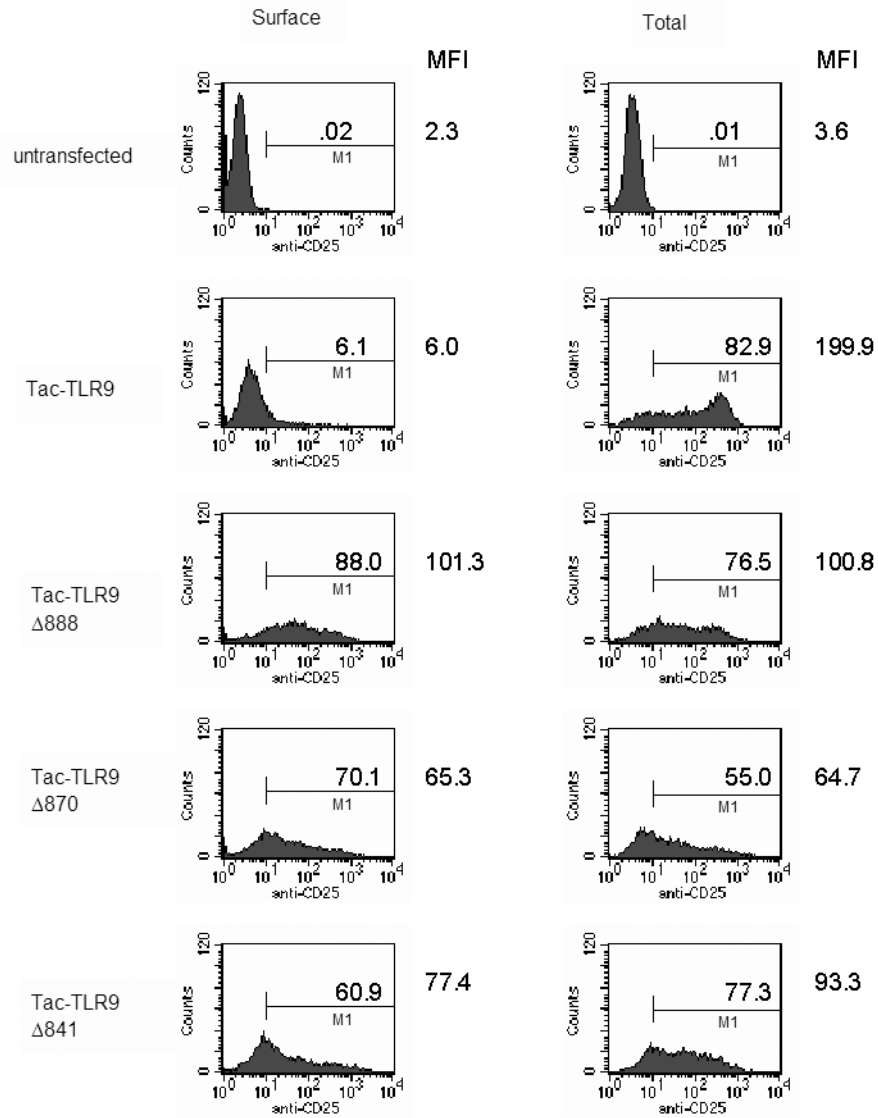

### SUP. FIGURE 3

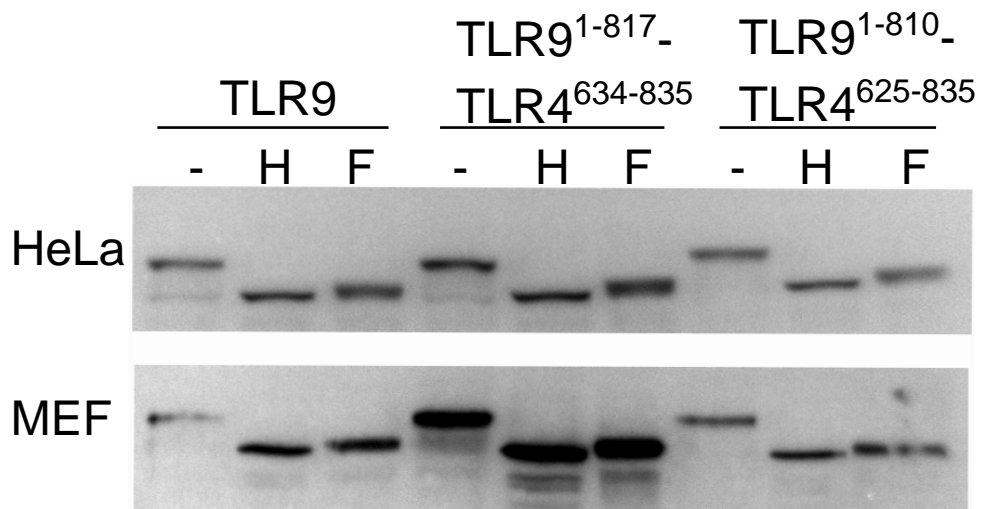

## SUP. FIGURE 4

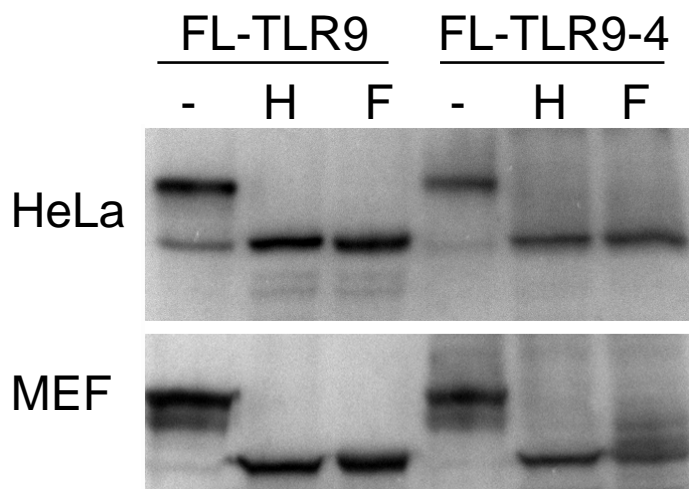

## SUP. FIGURE 5

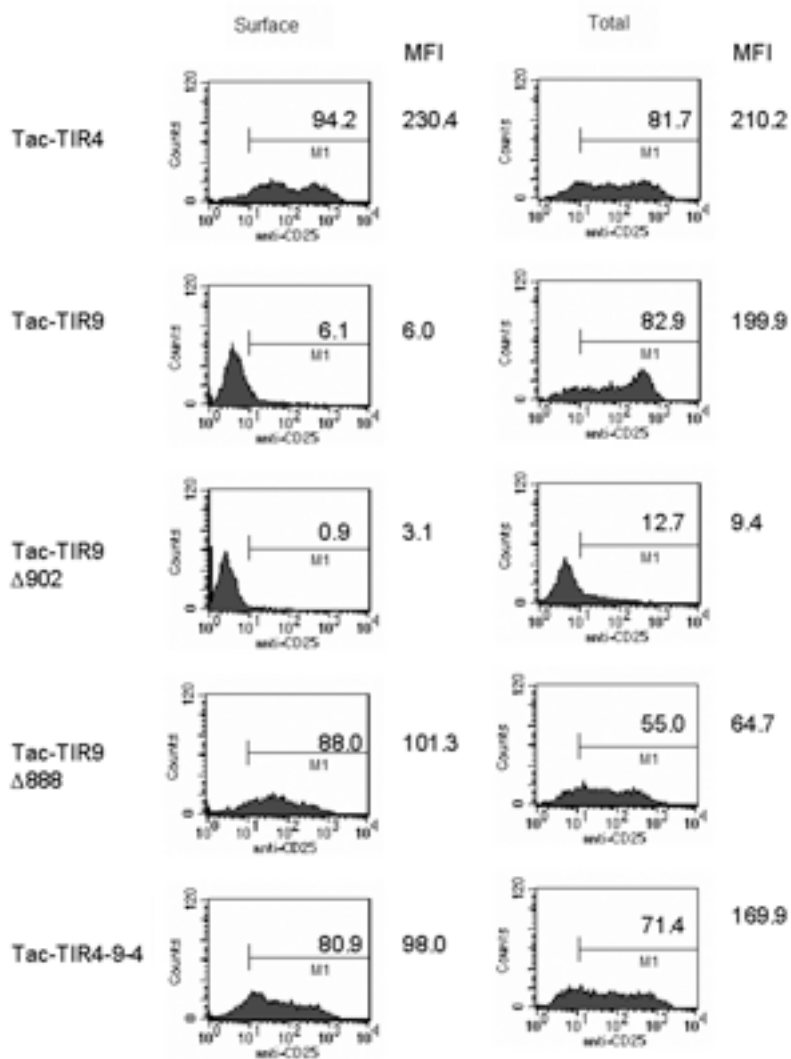

Supplement: NIHMS148879-supplement-Supplementary_Figures.pdf [file NIHMS148879-supplement-Supplementary_Figures.pdf]
